# Supplementary material for: A putative nuclear copper chaperone promotes plant immunity in Arabidopsis
Source: PubMed Central journal article supplement (PMC7586746; doi:10.1093/jxb/eraa401), 2020-08-31
Supplement: eraa401_suppl_supplementary_file001.pdf [file eraa401_suppl_supplementary_file001.pdf]

## Supplementary Figures and tables

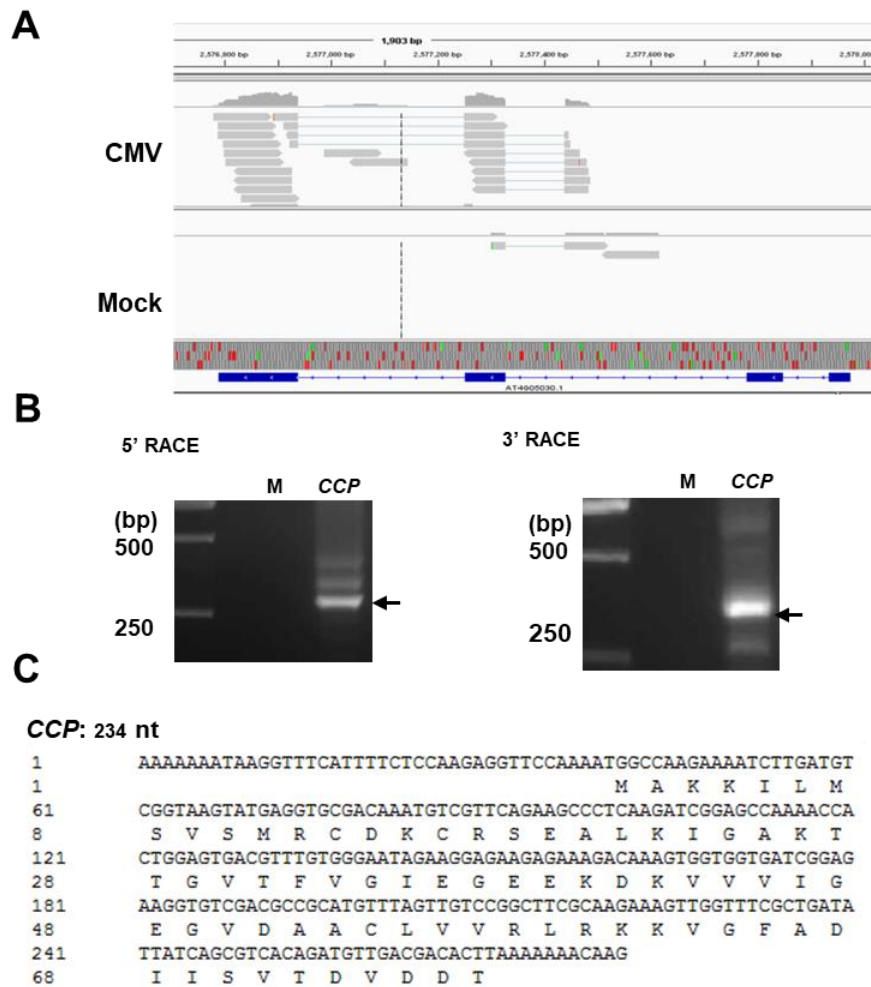

**Supplementary Fig. 1.** Identification of a CMV-induced copper chaperone in *Arabidopsis*. **(A)** Integrative Genomics Viewer (IGV) showing the transcriptome data analysis of the CMV-infected plants and mock plants. The bottom panel indicate the *AT4G05030* genome in the TAIR10 gene annotation, in which blue boxes and lines represent exons and introns, respectively. **(B)** Amplified PCR products of the 3' RACE and 5' RACE for sequencing. **(C)** Diagram of the nucleotide sequence and amino acid sequence of the identified CCP cDNA.

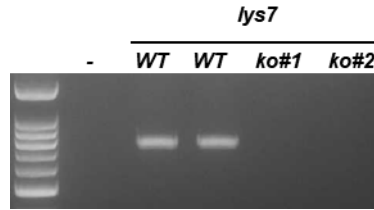

**Supplementary Fig. 2.** RT-PCR confirming the deletion of *Lys7* in the *lys7* mutant.

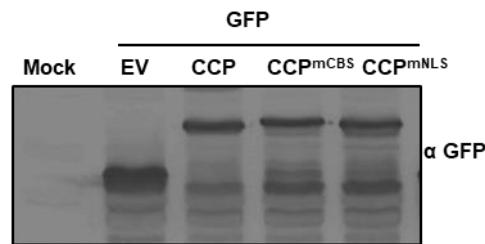

**Supplementary Fig. 3.** Western blotting showing accumulation of GFP, GFP-CCP, CCP<sup>mCBS</sup>, and CCP<sup>mNLS</sup> in infiltrated leaves of H2B-RFP-transgenic *N. benthamiana* plants at 3 dpi.

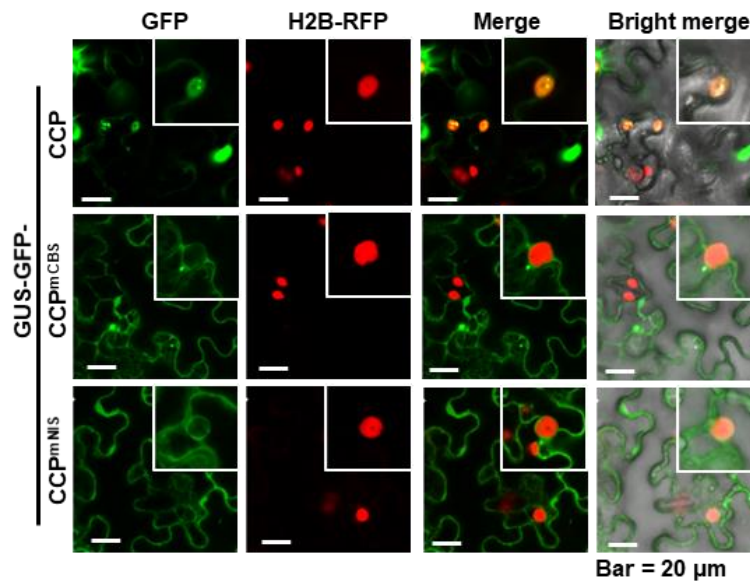

**Supplementary Fig. 4.** Confocal micrographs showing the subcellular localization of GUS-GFP-CCP, GUS-GFP-CCP<sup>mCBS</sup>, and GUS-GFP-CCP<sup>mNLS</sup> infiltrated leaves of H2B-RFP-transgenic *N. benthamiana* plants at 3 dpi.

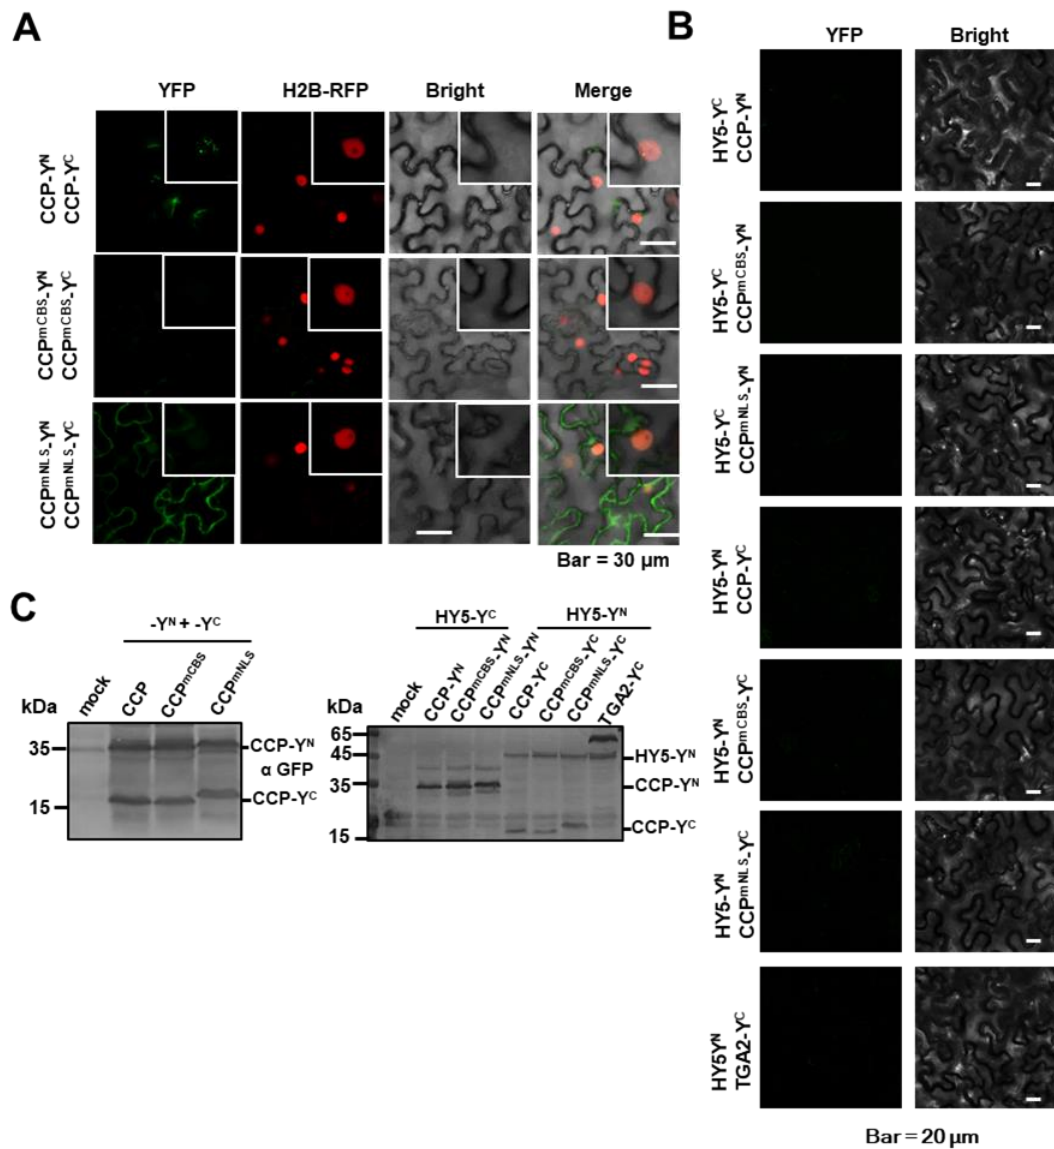

**Supplementary Fig. 5.** Examine the self-interactions of CCP and derivatives in *N. benthamiana* leaves. **(A)** BiFC analysis of the self-interactions of CCP, CCP<sup>mCBS</sup> and CCP<sup>mNLS</sup> in H2B-RFP transgenic *N. benthamiana* leaves. Bar = 30  $\mu$ m. **(B)** Negative controls of BiFC assays using HY5, CCP, CCP<sup>mCBS</sup>, CCP<sup>mNLS</sup>, and TGA2. **(C)** Western blotting showing protein accumulation in BiFC analysis with specific GFP antibody.

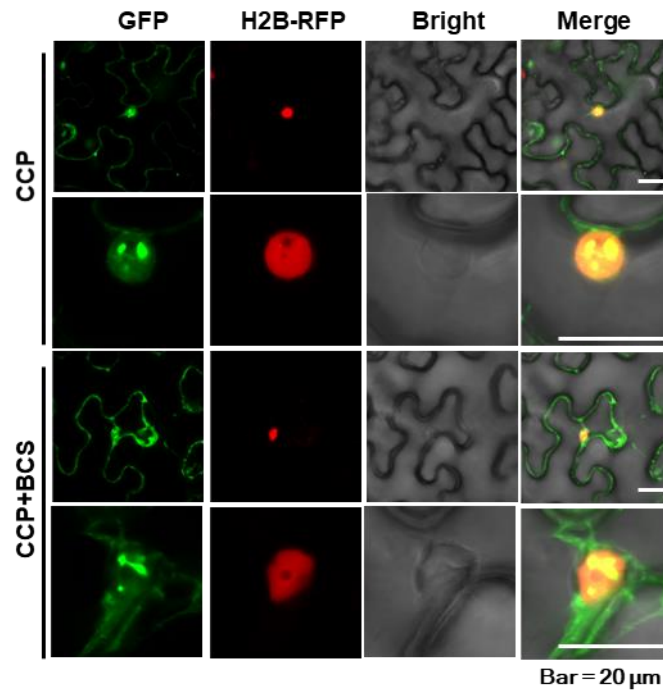

**Supplementary Fig. 6.** Subcellular localization of CCP in H2B-RFP transgenic *N. benthamiana* leaves treated with buffer or BCS (200  $\mu$ M). Photographs were taken at 3 dpi. Bar = 20  $\mu$ m

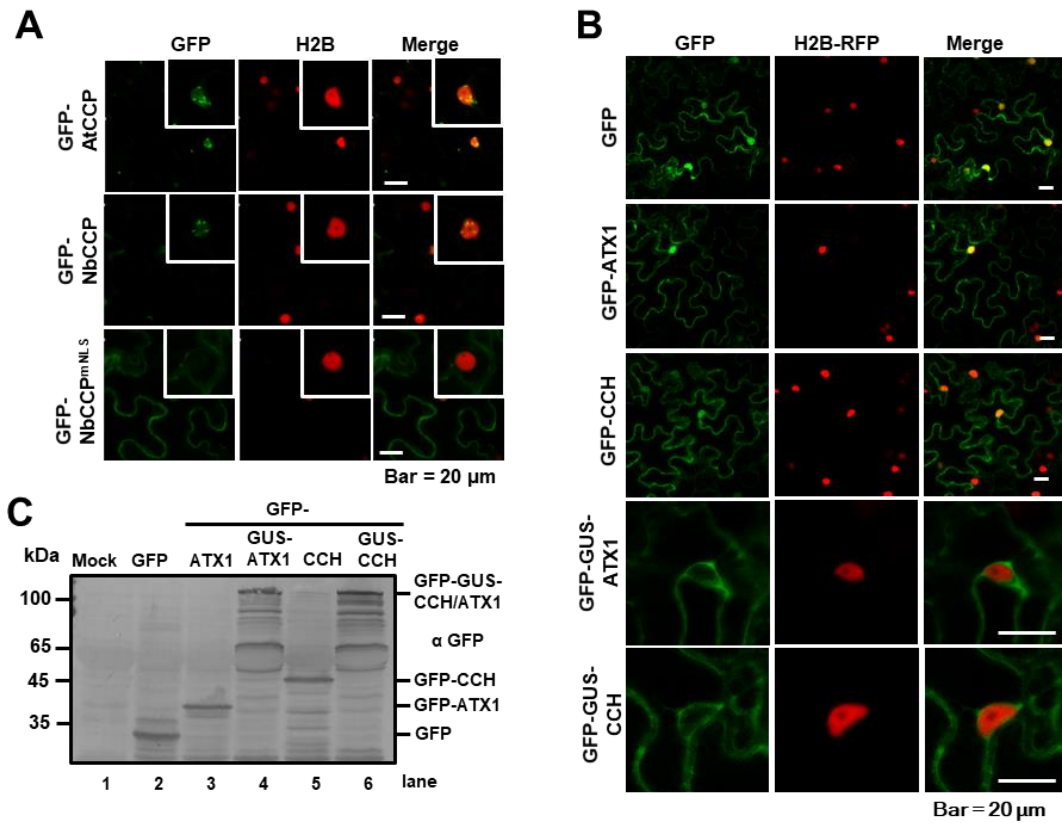

**Supplementary Fig. 7.** Subcellular localization of NbCCP (**A**), AtATX1, AtCCH, GUS-ATX1 and GUS-CCH (**B**) in H2B-RFP transgenic *N. benthamiana* leaves. Photographs were taken at 3 dpi. Bar = 20  $\mu$ m. (**C**) Western blotting showing accumulation of GFP, GFP-ATX1, CCH, GUS-ATX1 and GUS-CCH in infiltrated leaves of panel A and B.

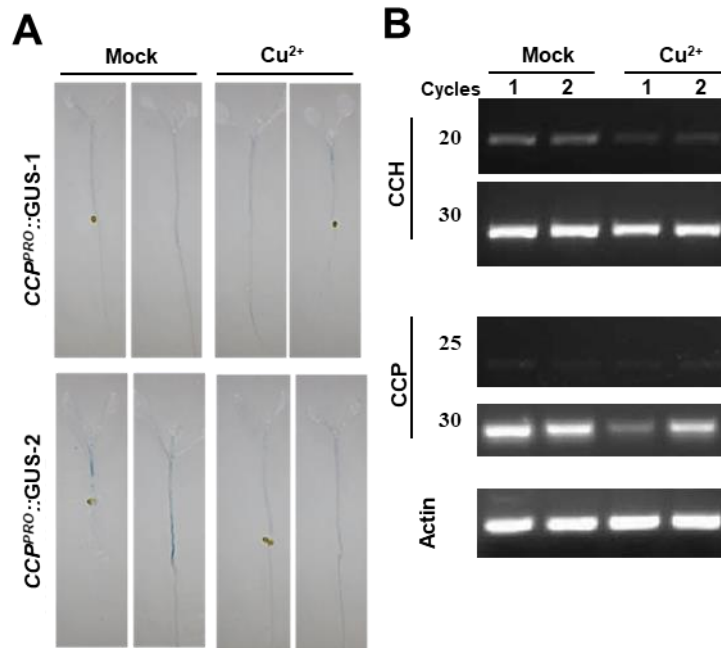

**Supplementary Fig. 8.** Accumulation of CCP under excess Cu. **(A)** GUS activity in two independent *CCP<sup>Pro</sup>::GUS* transgenic lines treated with mock buffer or excess Cu treatment. Plants were grown on 1/2 MS for 11 d and transferred to 1/2 MS with mock buffer or CuSO<sub>4</sub> (35 μm) for 3 d. **(B)** Semi-quantitative PCR analyzing accumulation of CCP, CCH, and actin mRNA in the plants of panel A.

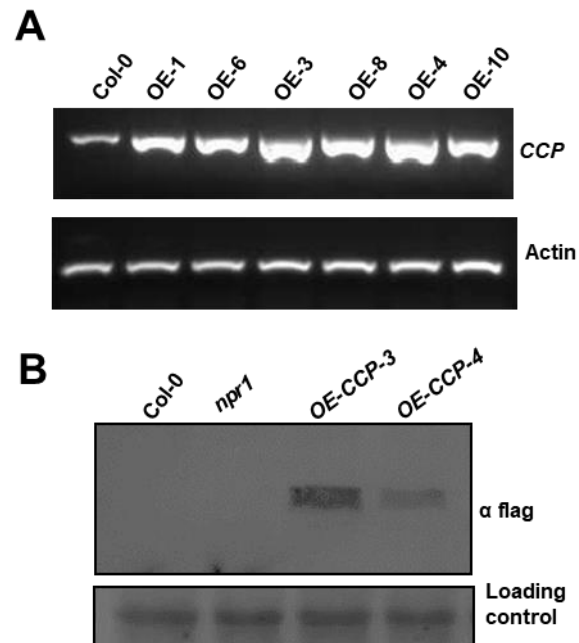

**Supplementary Fig. 9.** Accumulation of the CCP mRNA (**A**) and protein (**B**) in CCP overexpression lines. The Actin mRNA served as a positive control for RT-PCR. Col-0 leaves acted as a negative control. CBB staining was used as the protein loading controls.

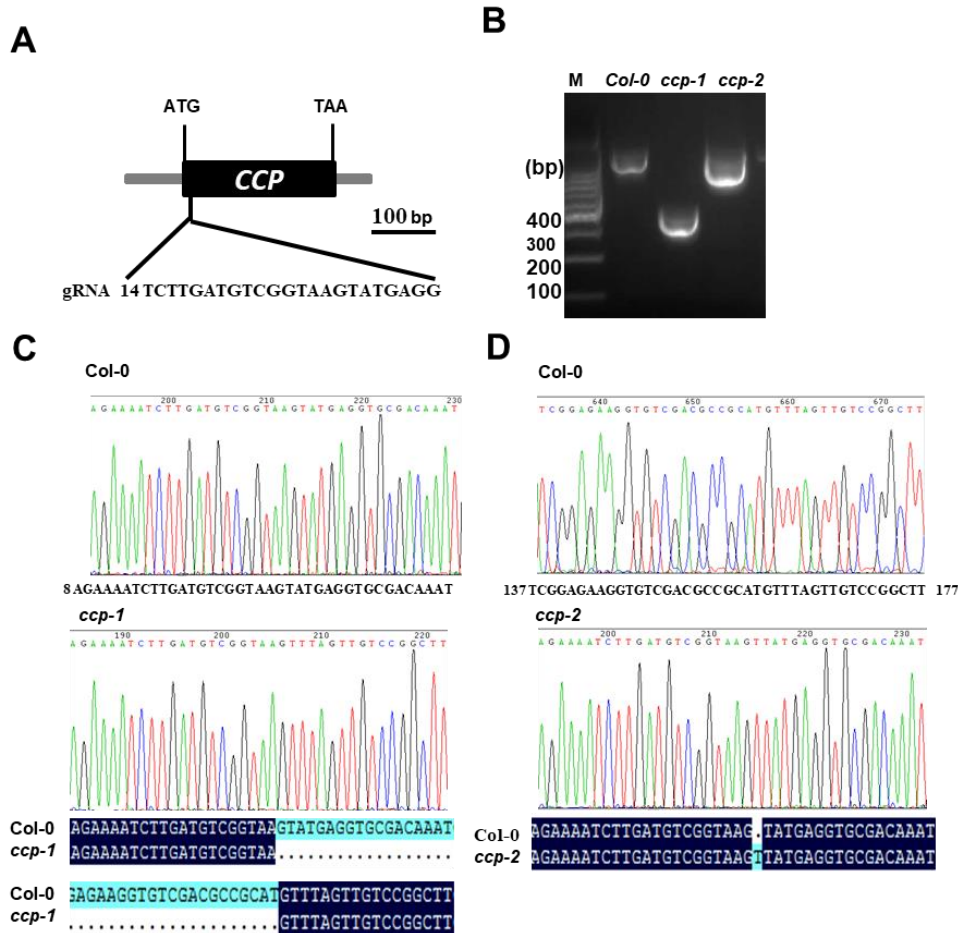

**Supplementary Fig. 10.** Identification of *ccp-1* and *ccp-2* mutant lines. **(A)** Diagram showing the CRISPR/Cas9-targeting site in the *CCP* cDNA. The coding sequence and untranslated regions of MDP60 are indicated by black box and gray boxes, respectively. **(B)** RT-PCR analysis of *ccp-1* and *ccp-2* mutants. Alignments between Col-0 and the *ccp-1* mutant **(C)** or **(D)** the *ccp-2* mutant, and the deletion and inserted regions are indicated by blue in the bottom panels.



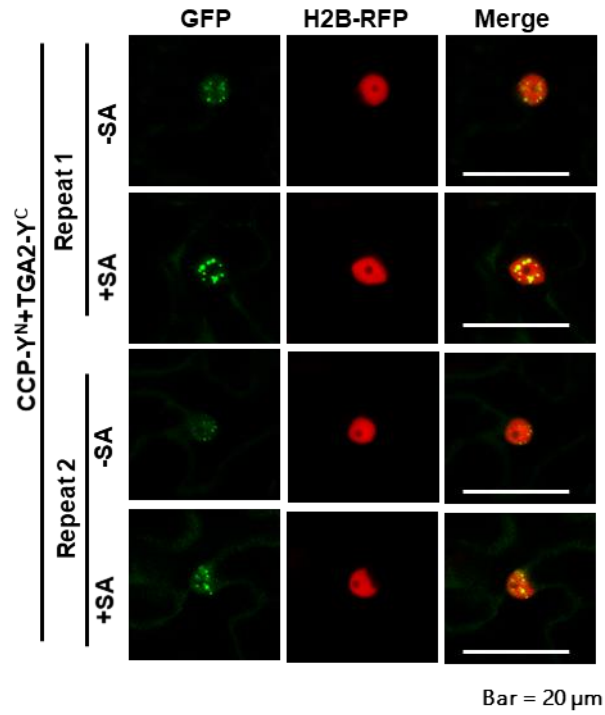

**Supplementary Fig. 11.** BiFC analyzing the interactions of CCP and TGA2 in epidermal cells of *N. benthamiana* leaves treated with buffer or SA (1 mM). Photographs were taken at 3 dpi. RFP, red fluorescent protein. Bar = 20 μm.

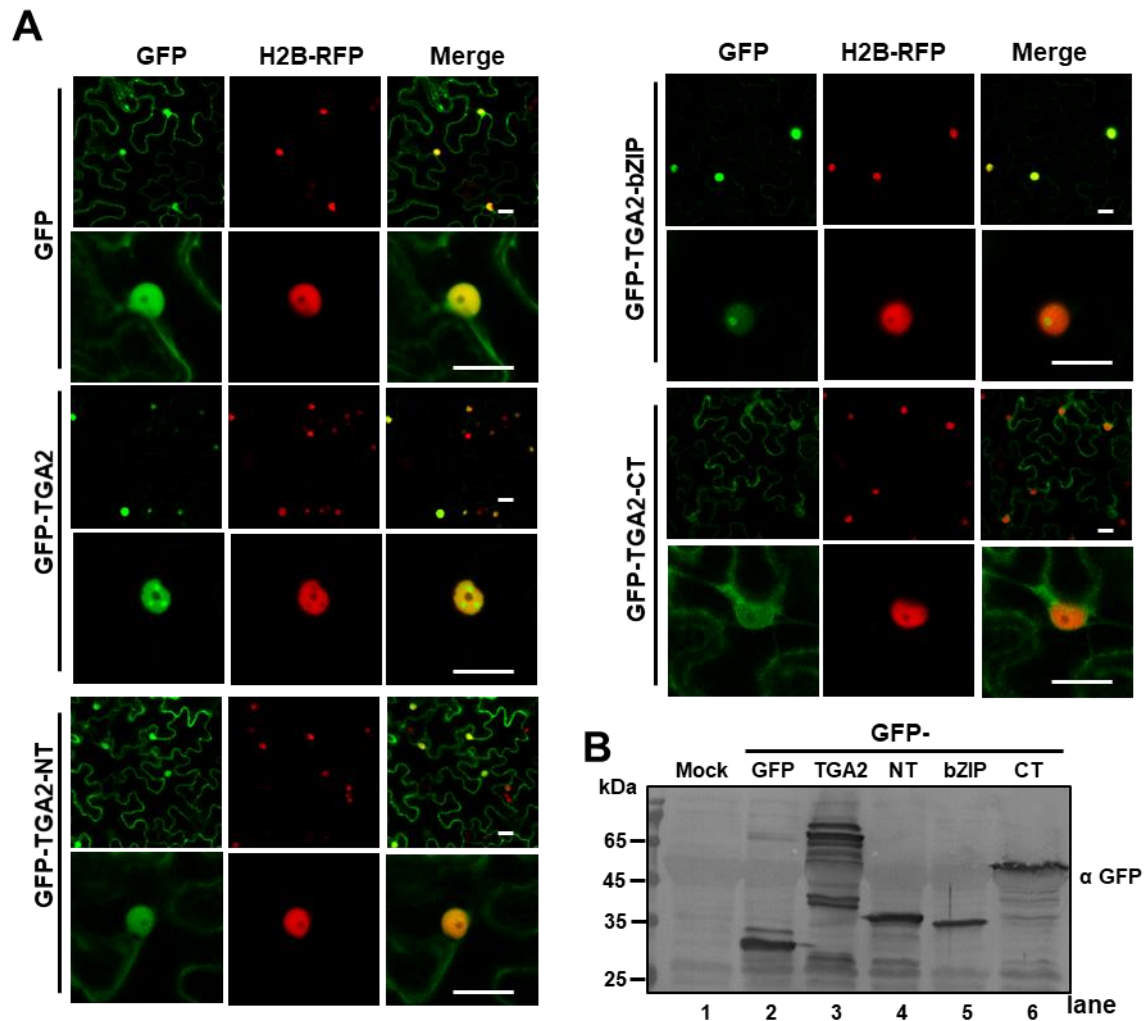

**Supplementary Fig. 12.** Subcellular localization of TGA2 and mutants **(A)** GFP, GFP-TGA2, GFP-TGA2-NT, GFP-TGA2-bZIP and GFP-CT in H2B-RFP transgenic *N. benthamiana* leaves. Photographs were taken at 3 dpi. RFP, red fluorescent protein. Bar = 20  $\mu$ m. **(B)** Western blotting showing accumulation of GFP, GFP-TGA2, TGA2-NT, TGA2-bZIP and TGA2-CT in infiltrated leaves of H2B-RFP-transgenic *N. benthamiana* plants at 3 dpi.

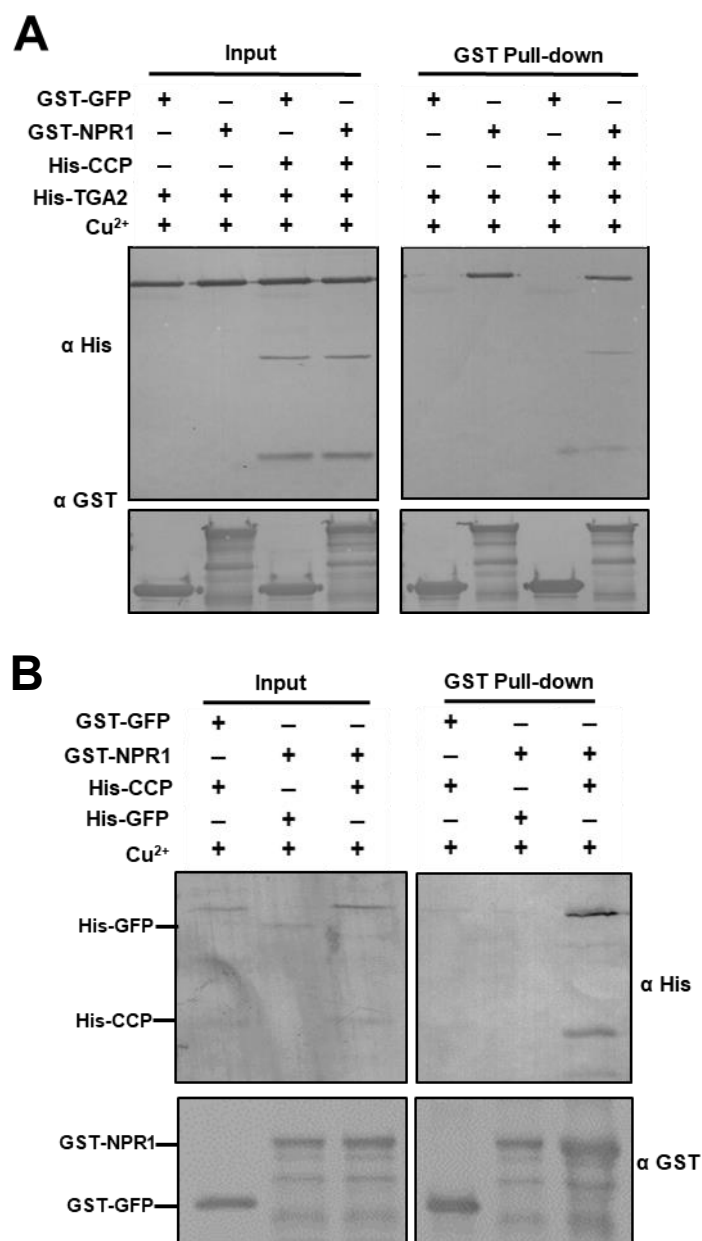

**Supplementary Fig. 13.** GST pull-down analysis of the complex NPR1, TGA2 and CCP *in vitro*. (A) GST-GFP or GST-NPR1 were incubated with His-TGA2 or HIS-TGA2 and HIS-CCP (with 50  $\mu$ M Cu<sup>2+</sup>), then immunoprecipitated with glutathione-Sepharose beads *in vitro*. (B) GST-GFP or GST-NPR1 were incubated with His-CCP or His-GFP for immunoprecipitation with GST beads *in vitro*. The Input and pull-down products were detected by western blotting analysis with anti-GST or anti-His antibodies.

**Table S1 Primers used in this study**

| Primer <sup>a</sup> | Sequence (5' to 3') <sup>b</sup>                | Notes                                                                          |
|---------------------|-------------------------------------------------|--------------------------------------------------------------------------------|
| HC511-18TR          | GGATATCTGCAGGATCCAAGCTTTTTTTTTTTTTTTT<br>TTT    | For 3' race                                                                    |
| HC511BH R           | GGATATCTGCAGGATCCAAGC                           | For 3' race                                                                    |
| Adaptor-F:          | G TTCAGAGTTCTACAGTCCGACGATC                     | For 5' race                                                                    |
| GSP-CCP-R1          | AGTGTCGTCAACATCTGTGAC                           | For 5' race                                                                    |
| GSP-CCP-R2          | GCTGATAATATCAGCGAAAC                            | For 5' race                                                                    |
| DT1-BsF             | ATATATGGTCTCGATTTCTTGATGTCGGTAAGTAT<br>GGTT     | Construction of <i>ccp</i> mutant by CRISPR/Cas9 system                        |
| DT1-F0              | TTCTTGATGTCGGTAAGTATGGTTTTAGAGCTAGA<br>AATAGC   |                                                                                |
| DT1-R0              | AACCATGTTTAGTTGTCCGGCTTAATCTCTTAGTC<br>GACTCTAC |                                                                                |
| DT1-BsR             | ATTATTGGTCTCGAAACCATGTTTAGTTGTCCGGC<br>TT       |                                                                                |
| Cas9-target-F       | ATACGGAAGGTTTTAGGATGAAGTAT                      | Detection of mutation in <i>ccp</i> mutants                                    |
| Cas9-target-R       | TTAAAGTGGCTAGGAAAACAGAGA                        |                                                                                |
| GUS-F               | CCGCTCGAGCTATGGTCCGTCCTGTAGAAACCCC<br>AACCCG    | PCR of <i>GUS</i> DNA or RT-PCR of <i>GUS</i> mRNA( <i>Xho1/Hind111</i> )      |
| GUS-R               | CCCAAGCTTGTTGTTTGCCTCCCTGCTGCGGTTT<br>TTCACCG   |                                                                                |
| pGDG-CCP-F          | AAAAGTGCAGTCATGGCCAAGAAAATCTTGATGT<br>CGG       | RT-PCR of <i>CCP</i> mRNA ( <i>Pst1/BamH1</i> )                                |
| pGDG-CCP-R          | CGCGGATCCAGTGTGTCGAACATCTGTGACGCTG              |                                                                                |
| CCP-promoter-F1     | CCCAAGCTTCAACAATCCTAAAATCATCACACAAAA<br>ATCG    | Construction of the promoter of the <i>CCP</i> gene( <i>Hind111/Xba1,GUS</i> ) |
| CCP-promoter-R1     | CTAGTCTAGAAGTGTGTCGAACATCTGTGACGCT<br>GATAATATC |                                                                                |
| CCP-promoter-F2     | CGGAATTCCACAATCCTAAAATCATCACACAAAA<br>TCG       | Construction of the promoter of the <i>CCP</i> gene( <i>EcoR1/Xho1,GFP</i> )   |
| CCP-promoter-R2     | CCGCTCGAGAGTGTGTCGAACATCTGTGACGCTG<br>ATAATATC  |                                                                                |
| pMD19T-CCP-F1       | CCAAGAGGTTCCAAAACGGCCAAGAAAATCTTG               | Construction of the mutant of the <i>CCP</i> gene (ATG-ACG)                    |
| pMD19T-CCP-R1       | CAAGATTTTCTTGCCGTTTTGGAACCTCTTGG                |                                                                                |
| pMD19T-CCP-F2       | TCGGTAAGTATGAGGGGTGACAAAGGTCGTTCCAG<br>AAGCCCTC |                                                                                |

|                     |                                                                    |                                                                                            |
|---------------------|--------------------------------------------------------------------|--------------------------------------------------------------------------------------------|
| pMD19T-CCP-R2       | GAGGGCTTCTGAACGACCTTTGTCACCCCTCATA<br>CTTACCGA                     | Construction of the mutant of the <i>CCP</i> gene (CBS C13, 16G)                           |
| pMD19T-CCP-F3       | CCGGCTTCGCGAAGAAGTTGGTGAAGCTGATATT<br>ATCAGCGTCACAGATGTTG          | Construction of the mutant of the <i>CCP</i> gene (NLS E61R, E62R, F65R)                   |
| pMD19T-CCP-R3       | CAACATCTGTGACGCTGATAATATCAGCTTCACCA<br>ACTTCTTCGCGAAGCCGG          |                                                                                            |
| pMD19T-CCP-F4       | CTAGCTTGTGAGGGAAGAAGTCGGCGAAGCCA<br>GCTTGGTGCTTGTGATG              | Construction of the mutant of the <i>Nb-CCP</i> gene (NLS)                                 |
| pMD19T-CCP-R4       | CATCAACAAGCACCAAGCTGGCTTCGCCGACTTC<br>TTCCCTCAACAAGCTAG            |                                                                                            |
| <i>ccs(lys7)</i> -F | GAATAAAGATATCTTTGCAAGGCAGAAACCCATT<br>GATCAGCACCGGATCCCCGGGTTAATTA | Construction of the mutant of the <i>yeast ccs</i> strain                                  |
| <i>ccs(lys7)</i> -R | GTTATATCTGTATTACGCTACGTTGTGCTATCTTG<br>GATGTTGAATTCGAGCTCGTTTAAAC  |                                                                                            |
| CCS(LYS7)-F         | ATGACCACGAACGATACATA                                               | Detection of the mutant of the <i>yeast ccs</i> strain                                     |
| CCS(LYS7)-R         | CTATTTGATGTTGTTGGCCA                                               |                                                                                            |
| pGPD-CCP-F          | CTAGTCTAGAATGGCCAAGAAAATCTTGATGTCG<br>G                            | RT-PCR of <i>CCP</i> mRNA, yeast complementation( <i>Xba</i> 1/ <i>Bam</i> H1)             |
| pGPD-CCP-R          | CGCGGATCCAGTGTCTCAACATCTGTGACGC                                    |                                                                                            |
| GST-CCP-F           | TCGGATCTGGTTCGCGTGGAAATGGCCAAGAAAA<br>TCTTGAT                      | Construction of the N-terminal GST-fused NPR1 ( <i>Bam</i> H1)                             |
| GST-CCP-R           | ACCACCGGAAATTCGCGGGGAAGTGTCTCAACA<br>TCTGTGA                       |                                                                                            |
| GST-TGA2-F          | TCGGATCTGGTTCGCGTGGATCCATGGCTGATA<br>CCAGTCCGAG                    | Construction of the N-terminal GST-fused TGA2( <i>Bam</i> H1)                              |
| GST-TGA2-R          | ACCACCGGAAATTCGCGGGATCCCTCTCTGGGT<br>CGAGCAAGCC                    |                                                                                            |
| 6xHis-CCP-F         | CCGGAATTCATGGCCAAGAAAATCTTGATGTCGG                                 | Construction of the N-terminal His-fused CCP or CCP mutants ( <i>Eco</i> R1/ <i>Xho</i> 1) |
| 6xHis-CCP-R         | CCGCTCGAGTAGTGTCTCAACATCTGTACGC                                    |                                                                                            |
| pSPYNE-CCP-F        | AGGCCTGGCGGCCACTAGTGGATCCATGGCCA<br>AGAAAATCTTGAT                  | RT-PCR of <i>CCP</i> mRNA, BiFC ( <i>Bam</i> H1)                                           |
| pSPYNE-CCP-R        | AGGTCGACAGTACTATCGATGGATCCAGTGTCTG<br>CAACATCTGTGA                 |                                                                                            |
| pSPYCE-TGA2-F1      | AGGCCTGGCGGCCACTAGTGGATCCATGGCTG<br>ATACCAGTCCGAG                  | RT-PCR of <i>TGA2</i> mRNA, BiFC ( <i>Bam</i> H1)                                          |
| pSPYCE-TGA2-R1      | AGGTCGACAGTACTATCGATGGATCCCTCTCTGG<br>GTCGAGCAAGCC                 |                                                                                            |

|                 |                                                       |                                                                                      |
|-----------------|-------------------------------------------------------|--------------------------------------------------------------------------------------|
| pSPYCE-TGA2-R2  | AGGTCGACAGTACTATCGATGGATCCCTTTTGAT<br>CCATCTTTCCCT    | RT-PCR of <i>TGA2</i> (0-46 aa) mRNA, BiFC ( <i>BamH1</i> )                          |
| pSPYCE-TGA2-F3  | AGGCCTGGCGCGCCACTAGTGGATCCATGACTCT<br>TCGTAGGCTTGC    | RT-PCR of <i>TGA2</i> (47-95 aa) mRNA, BiFC ( <i>BamH1</i> )                         |
| pSPYCE-TGA2-R3  | AGGTCGACAGTACTATCGATGGATCCGACGCCCT<br>GCTGTCTTGCTC    |                                                                                      |
| pSPYCE-TGA2-F4  | AGGCCTGGCGCGCCACTAGTGGATCCATGTTCAT<br>TTCAGGCACAGG    | RT-PCR of <i>TGA2</i> (96-330 aa) mRNA, BiFC ( <i>BamH1</i> )                        |
| pGDG-CCP-F      | CCGCTCGAGCTATGGCCAAGAAAATCTTGAT                       | Construction of the N-terminal GFP-fused CCP or CCP mutants ( <i>Xho1/BanH1</i> )    |
| pGDG-CCP-R      | CGCGGATCCTTAAGTGTGCTCAACATCTG                         |                                                                                      |
| pGDG-Nb-CCP-F   | CCGCTCGAGCTATGCTGCAAAAAGATTGTCAT                      | Construction of the N-terminal GFP-fused Nb-CCP or CCP mutants ( <i>Xho1/BanH1</i> ) |
| pGDG-Nb-CCP-R   | CGCGGATCCCTTGATTTTCATCAACAAGCACC                      |                                                                                      |
| pGDG-GUS-ATX1-F | CTATACAAGTCCGGACTCAGATCTATGGTCCGTC<br>CTGTAGAAACC     | Construction of the GFP-GUS-ATX1 ( <i>BglIII</i> )                                   |
| pGDG-GUS-ATX1-R | GTCTTTAAGCATAGCTCGAGATCTTTGTTTGCCT<br>CCCTGCTGCGG     |                                                                                      |
| pGDG-GUS-CCH-F  | CTATACAAGTCCGGACTCAGATCTATGGTCCGTC<br>CTGTAGAAACC     | Construction of the GFP-GUS-CCH ( <i>BglIII</i> )                                    |
| pGDG-GUS-CCH-R  | GGTCTGAGCCATAGCTCGAGATCTTTGTTTGCCT<br>CCCTGCTGCGG     |                                                                                      |
| pGDG-TGA2-F     | CTATACAAGTCCGGACTCAGATCTATGGCTGATA<br>CCAGTCCGAG      | Construction of the GFP-TGA2( <i>BglIII</i> )                                        |
| pGDG-TGA2-R     | GAATTCGAAGCTTGAGCTCGAGATCTCTCTCTGG<br>GT CGAGCAAGCC   |                                                                                      |
| pGDG-NT-R       | GAATTCGAAGCTTGAGCTCGAGATCTCTTTTGATC<br>C ATCTTTCCCTTC | Construction of the GFP-TGA2-NT ( <i>BglIII</i> )                                    |
| pGDG-bZIP-F     | CTATACAAGTCCGGACTCAGATCTATGACTCTTC<br>GTAGGCTTGC      | Construction of the GFP-TGA2-bZIP ( <i>BglIII</i> )                                  |
| pGDG-bZIP-R     | GAATTCGAAGCTTGAGCTCGAGATCTGACGCCCT<br>GC TGTCTTGCTC   |                                                                                      |
| pGDG-CT-R       | CTATACAAGTCCGGACTCAGATCTATGTTCAATTC<br>AGGCACAGGAGAC  | Construction of the GFP-TGA2-C T ( <i>BglIII</i> )                                   |
| pMDC32-CCP-F    | AGGCGCGCCATGGCCAAGAAAATCTTGAT                         |                                                                                      |

|                    |                                                 |                                                                                   |
|--------------------|-------------------------------------------------|-----------------------------------------------------------------------------------|
| pMDC32-CCP-R       | GACTAGTAGTGTCGTC AACATCTGTGAC                   | Construction of the C-terminal Flag-fused CCP or CCP mutants ( <i>Asc1/Spe1</i> ) |
| pMDC32-TGA2-F      | CTCTAGAGGATCCCCGGGTACCATGGCTGATACC<br>AGTCCGAG  | Construction of the C-terminal Flag-fused TGA2 ( <i>Kpn1/Spe1</i> )               |
| pMDC32-TGA2-R      | GTCCATGCCACCTCCACTAGTCTCTCTGGGTCTCGA<br>GCAAGCC |                                                                                   |
| LS7-F              | Biotin-CCTCTTGAGAACGTCATAGAAATCTAGATT           | EMSA probe                                                                        |
| LS7-R              | Biotin-AATCTAGATTTCTATGACGTTCTCAAGAGG           |                                                                                   |
| <i>npr1</i> -F     | ATGGACACCACCATTGATGGATTTCGC                     | Detection of the mutant of <i>npr1</i>                                            |
| <i>npr1</i> -R     | CTATCCAATAGCTTCATACAAGCTTTACCAC                 |                                                                                   |
| <i>AtActin2</i> -F | GCACCCTGTTCTTCTTACCG                            | qRT-PCR of <i>AtActin2</i> mRNA                                                   |
| <i>AtActin2</i> -R | AACCCTCGTAGATTGGCACA                            |                                                                                   |
| Chip-F(a)          | CCTAATGTAACATGTTATTCTAC                         | qRT-PCR for ChIP                                                                  |
| Chip-R(a)          | CTTTTTTATATGGAGGGAGAATCA                        |                                                                                   |
| Chip-F(b)          | GGATAAATCTCAATGGGTGATC                          |                                                                                   |
| Chip-R(b)          | ATGAGTATCTCTATCACTCT TG                         |                                                                                   |
| Chip-F(c)          | TATTGACTGTTTCTCTACGTC                           |                                                                                   |
| Chip-R(c)          | TTCTTAGTGTTTCATGCATAT                           |                                                                                   |

<sup>a</sup>/F: forward primer; /R: reverse primer. <sup>b</sup>The sequence shown in lower letters is homologous to other primer as indicated in Notes column, to facilitate In-Fusion cloning;
